# Supplementary material for: On-Demand Free Radical Release by Laser Irradiation for Photothermal-Thermodynamic Biofilm Inactivation and Tooth Whitening
Source: MDPI journal article supplement (doi:10.3390/gels9070554), 2023-07-07
Supplement: s1 [file s1]

# On-Demand Free Radical Release by Laser Irradiation for Photothermal–Thermodynamic Biofilm Inactivation and Tooth Whitening

Qi Zhang <sup>1</sup>, Yuan Liu <sup>1</sup>, Meng Ding <sup>2</sup>, Lihui Yuwen <sup>1,\*</sup> and Lianhui Wang <sup>1,\*</sup>

<sup>1</sup> State Key Laboratory of Organic Electronics and Information Displays & Jiangsu Key Laboratory for Biosensors, Institute of Advanced Materials (IAM), Nanjing University of Posts and Telecommunications, Nanjing 210023, China; zhangqi\_nj@163.com (Q.Z.); lyy657200@163.com (Y.L.)

<sup>2</sup> Nanjing Stomatological Hospital, Medicine School of Nanjing University, Nanjing 210008, China; xzdingmeng@163.com

\* Correspondence: iamlhyuwen@njupt.edu.cn (L.Y.); iamlhwang@njupt.edu.cn (L.W.)

## Supporting Figures

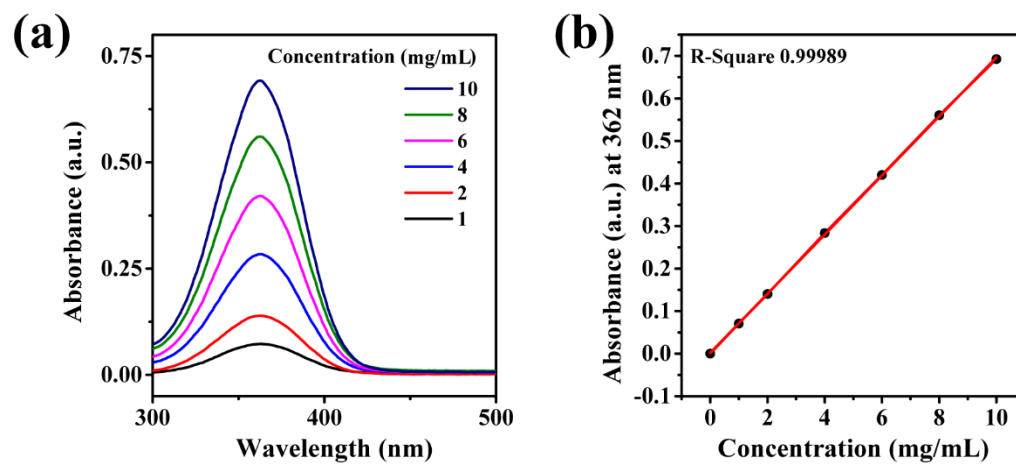

**Figure S1.** The working curve of AIPH aqueous solutions. (a) UV-Vis-NIR spectra of AIPH solutions at different concentrations. (b) The corresponding working curves.

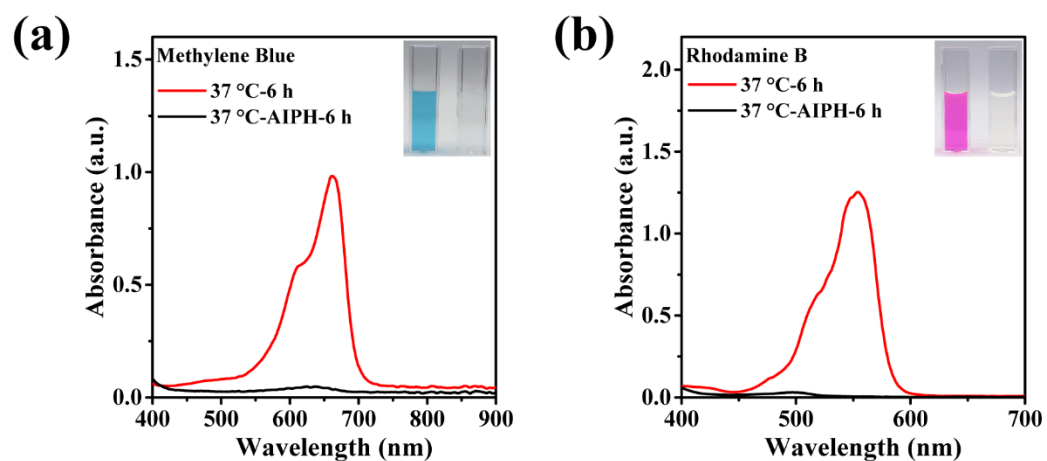

**Figure S2.** Degradation effect of alkyl radicals released from AIPH decomposition on dyes. UV-Vis-NIR spectra and photographs (inset) of methylene blue (a) and rhodamine B (b) under various incubation conditions.

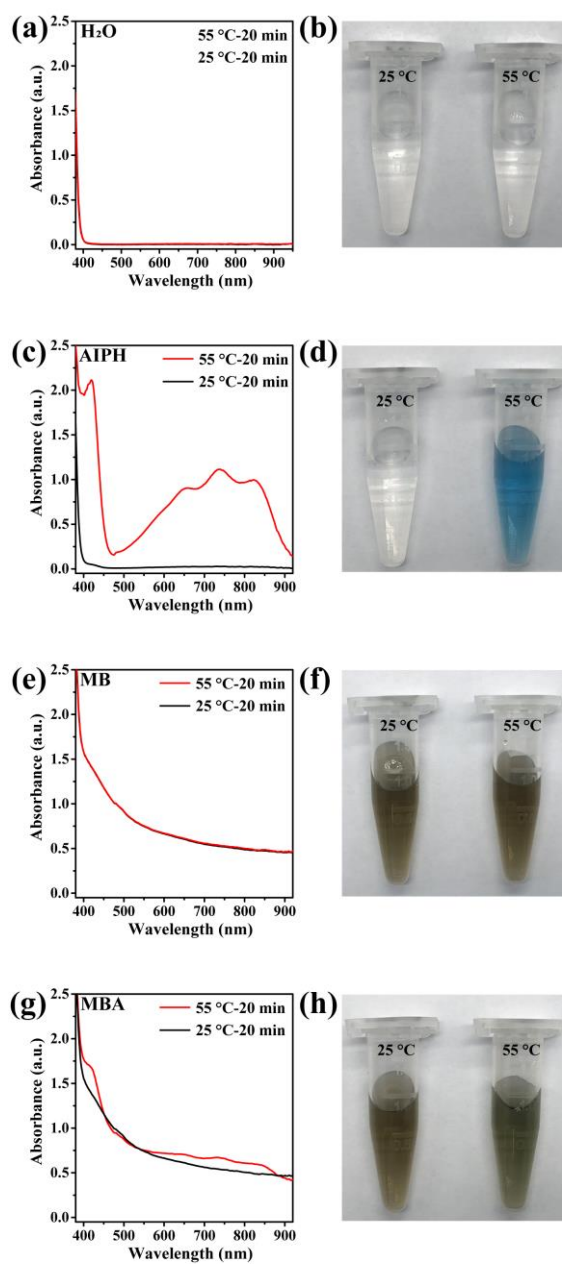

**Figure S3.** Detection of the formation of alkyl radicals by using ABTS. Ultraviolet-visible near-infrared (UV-Vis-NIR) spectra (a, c, e, g) and the corresponding photographs (b, d, f, h) of ABTS aqueous solutions after incubation under different conditions.

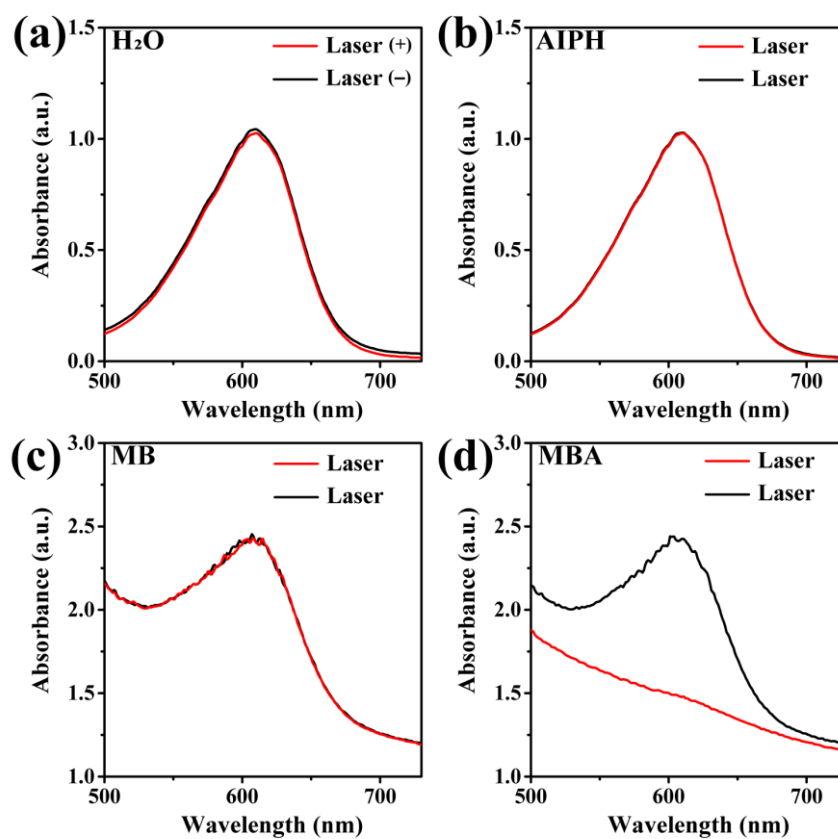

**Figure S4.** Laser-activated radical release for indigo carmine degradation. NIR light-triggered degradation of indigo carmine (50  $\mu\text{g/mL}$ ) by MB NSs with AIPH (MB NSs 40  $\mu\text{g/mL}$ , AIPH 60  $\mu\text{g/mL}$ ). Laser irradiation conditions were kept constant (808 nm, 1.0  $\text{W/cm}^2$ , 5 min) across all experimental groups.

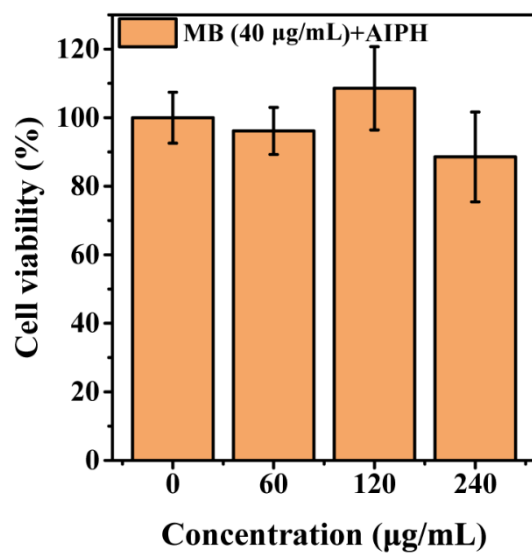

**Figure S5.** Cytotoxicity Assay. Cell viability of L-O2 cells after 24 hours incubation with AIPH and MB NSs aqueous solution (AIPH: 0, 60, 120, 240 µg/mL; MB NSs: 40 µg/mL).

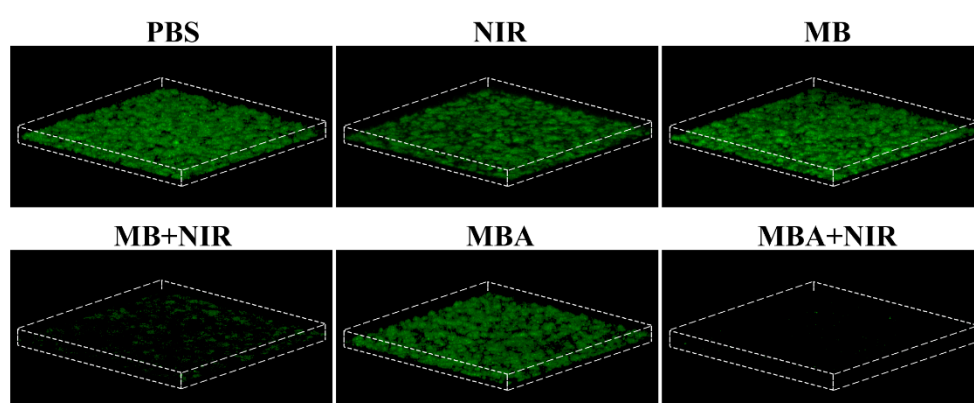

**Figure S6.** Three-dimensional (3D) CLSM images of *S. mutans* biofilms stained by Calcein-AM after various treatments (image size: 630  $\mu\text{m}$   $\times$  630  $\mu\text{m}$ ).

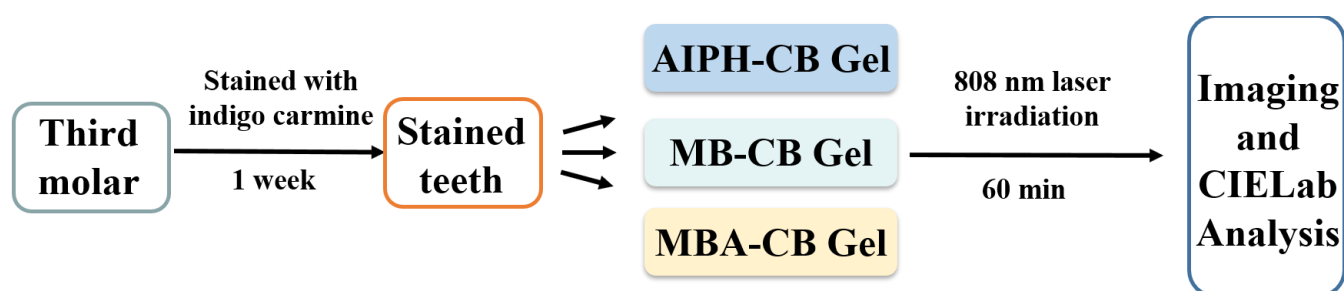

**Figure S7.** Flowchart of tooth whitening by different Gels.



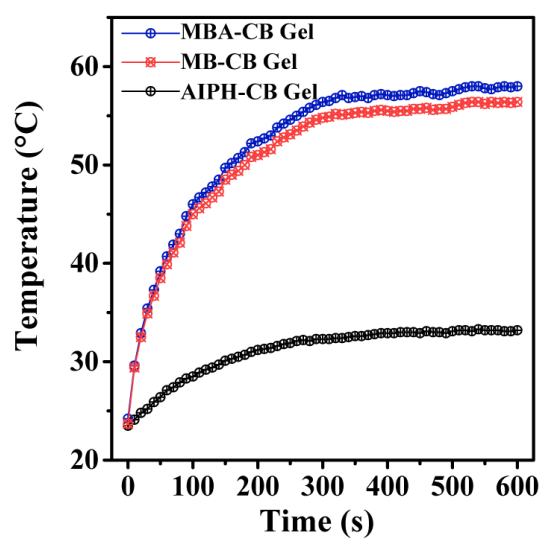

**Figure S8.** Laser-activated teeth cleaning. The temperature evolution curves of teeth treated with different gels (AIPH-CB Gel, MB-CB Gel, MBA-CB Gel). Laser irradiation conditions were kept constant (808 nm, 1.0 W/cm<sup>2</sup>, 10 min) across all experimental groups.
